# Supplementary material for: Lateralized Neural Valuation of Urban Ground-Layer Vegetation Informs Evidence-Based Planning Thresholds
Source: Research Square preprint supplement (doi:10.21203/rs.3.rs-8154001/v1), 2025-12-11
Supplement: Supplementary file 1 [file 1a7e0e8e2ba88d72b2ed344c.docx]

Supplementary Tab. 1 Plant Species List

| Planting Pattern | Color Pattern | Plant Height | Species Composition | Latin Name |
| --- | --- | --- | --- | --- |
| SG-LD | SC | >30cm | Joseph's-coat amaranth | *Amaranthus tricolor* |
| Yellow bluestem | *Bothriochloa ischaemum* |
| <30cm | White clover | *Trifolium repens* |
| MC | >30cm | Joseph's-coat amaranth | *Amaranthus tricolor* |
| Mugwort | *Artemisia spp.* |
| <30cm | White clover | *Trifolium repens* |
| Dandelion | *Taraxacum mongolicum* |
| SG-HD | SC | >30cm | Joseph's-coat amaranth | *Amaranthus tricolor* |
| Yellow bluestem | *Bothriochloa ischaemum* |
|  |  |
| <30cm | White clover | *Trifolium repens* |
| Chinese violet | *Viola philippica* |
| MC | >30cm | Joseph's-coat amaranth | *Amaranthus tricolor* |
| Japanese sage | *Salvia japonica* |
| Lindheimer's beeblossom | *Gaura lindheimeri* |
| Orange daylily | *Hemerocallis fulva* |
| <30cm | White clover | *Trifolium repens* |
| Dandelion | *Taraxacum mongolicum* |
| Chinese violet | *Viola philippica* |
| Garden phlox | *Phlox paniculata* |
| LN-LD | SC | > 30cm | Perennial ryegrass | *Lolium perenne* |
| <30cm | Bermuda grass | *Cynodon dactylon* |
| MC | >30cm | Perennial ryegrass | *Lolium perenne* |
|  |  |
| <30cm | Bermuda grass | *Cynodon dactylon* |
| Chinese violet | *Viola philippica* |
| LN-HD | SC | >30cm | Perennial ryegrass | *Lolium perenne* |
| Tall fescue | *Festuca arundinacea* |
| <30cm | Bermuda grass | *Cynodon dactylon* |
| Creeping bentgrass | *Agrostis stolonifera* |
| MC | >30cm | Perennial ryegrass | *Lolium perenne* |
| Tall fescue | *Festuca arundinacea* |
| Japanese sage | *Salvia japonica* |
| <30cm | Bermuda grass | *Cynodon dactylon* |
| Creeping bentgrass | *Agrostis stolonifera* |
| Chinese violet | *Viola philippica* |
| FM-LD | SC | >30cm | African marigold | *Tagetes erecta* |
| <30cm | Garden phlox | *Phlox paniculata* |
| MC | >30cm | Common zinnia | *Zinnia elegans* |
| <30cm | Garden phlox | *Phlox paniculata* |
| FM-HD | SC | >30cm | African marigold | *Tagetes erecta* |
| Orange daylily | *Hemerocallis fulva* |
| <30cm | Garden phlox | *Phlox paniculata* |
| Cutleaf coneflower | *Rudbeckia laciniata* |
| MC | >30cm | Hyacinth | *Hyacinthus orientalis* |
| Japanese sage | *Salvia japonica* |
| Red spider lily | *Lycoris radiata* |
| Chinese ixora | *Ixora chinensis* |
| <30cm | Garden phlox | *Phlox paniculata* |
| Wild pansy | *Viola tricolor* |
| Chinese violet | *Viola philippica* |
| Dandelion | *Taraxacum mongolicum* |
